# Supplementary material for: Assessments of prolonged effects of desflurane and sevoflurane on motor learning deficits in aged AppNL-G-F/NL-G-F mice
Source: PubMed Central journal article supplement (PMC8988377; doi:10.1186/s13041-022-00910-1), 2022-04-07

(A)

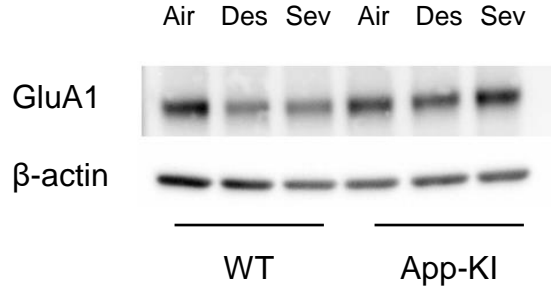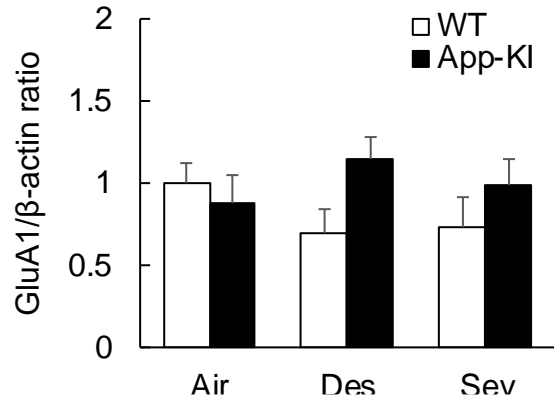

(B)

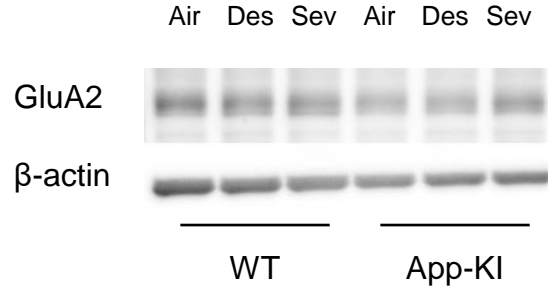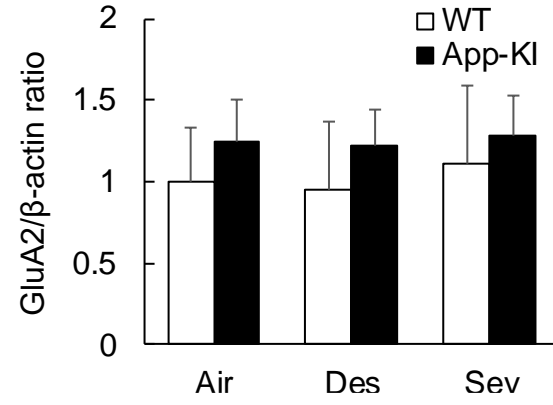

(C)

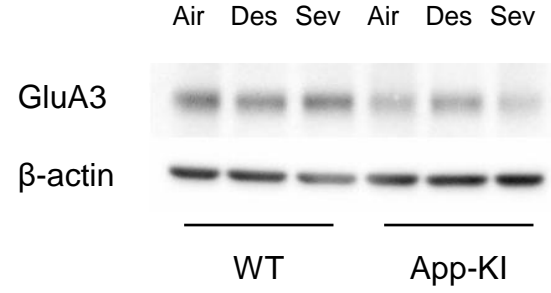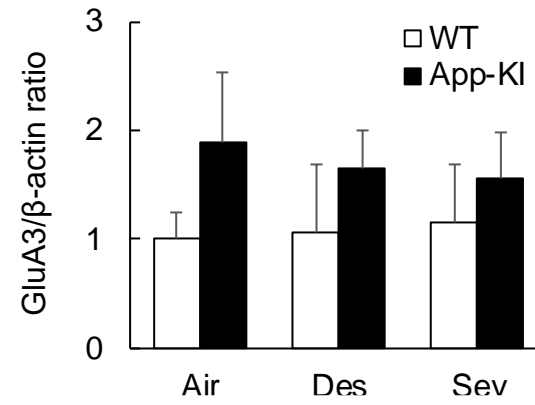

(D)

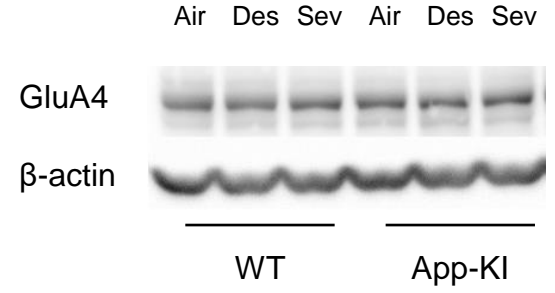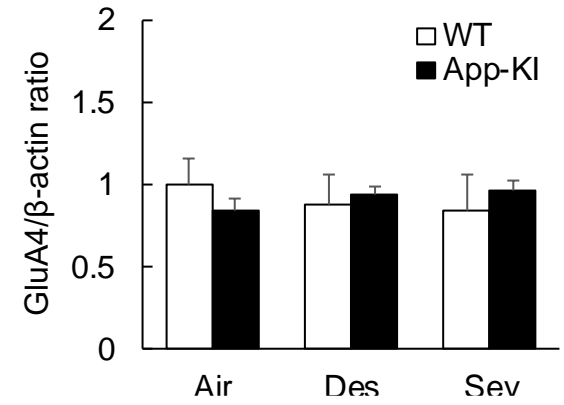

Supplement: 13041_2022_910_MOESM1_ESM.pdf [file 13041_2022_910_MOESM1_ESM.pdf]
